# Supplementary material
Source: MDPI journal article supplement (https://www.mdpi.com/2311-5629/7/1/23)
Supplement: s1 [file s1]

# Removal of Lead by Oxidized Graphite

Namasivayam Selvanantharajah<sup>1</sup>, Poobalasuntharam Iyngaran<sup>1</sup>, Poobalasingam Abiman<sup>1</sup>, and Navaratnarajah Kuganathan<sup>2\*</sup>

<sup>1</sup> Department of Chemistry, University of Jaffna, Sir. Pon Ramanathan Road, Thirunelvely, Jaffna, 40000, Srilanka.

<sup>2</sup> Department of Materials, Imperial College London, London, SW7 2AZ, United Kingdom.

\*Correspondence: n.kuganathan@imperial.ac.uk;

Received: date; Accepted: date; Published: date

## 1. Potential (V) versus current (A) graph for standard addition of $Pb^{2+}$ for graphite powder

Figure S1 shows current versus potential graph of SWASV with standard addition of  $Pb^{2+}$  (1–8  $\mu M$ ). Figure S2 shows standard addition plot of peak area from Figure S1 against added lead ion concentration (1–8  $\mu M$ ).

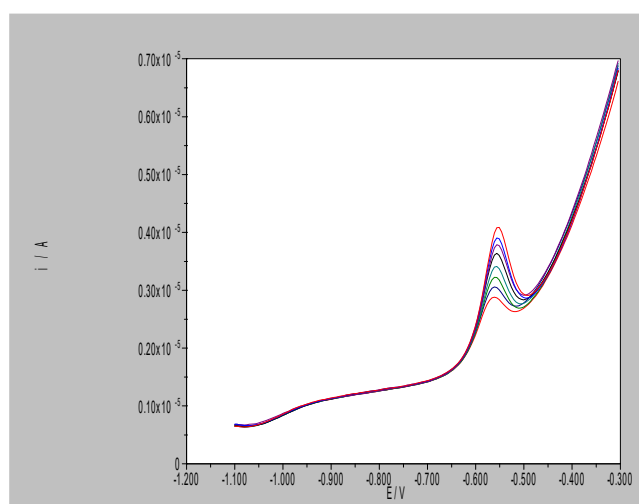

**Figure S1.** Potential versus current graph for standard addition of  $Pb^{2+}$  for graphite powder.

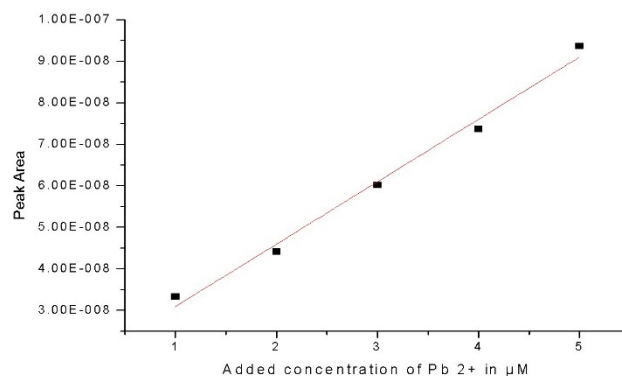

**Figure S2.** Standard addition plot of peak area from Figure S1 against added  $Pb^{2+}$  concentration (1–5  $\mu M$ ).

A 10.0 ml of 100  $\mu\text{M}$  of  $\text{Pb}^{2+}$  solution was exposed to 100.0 mg of graphite carbon powder. Bare graphite exhibits an adsorption capacity of 41.18%.

## 2. Potential (V) versus current (A) graph for standard addition of $\text{Pb}^{2+}$ solution for oxidized graphite powder.

Figure S3 shows the current versus potential graph of SWASV with standard addition of  $\text{Pb}^{2+}$  (1–5  $\mu\text{M}$ ). Figure S4 shows the standard addition plot of peak area from Figure S3 against added  $\text{Pb}^{2+}$  concentration (1–5  $\mu\text{M}$ ).

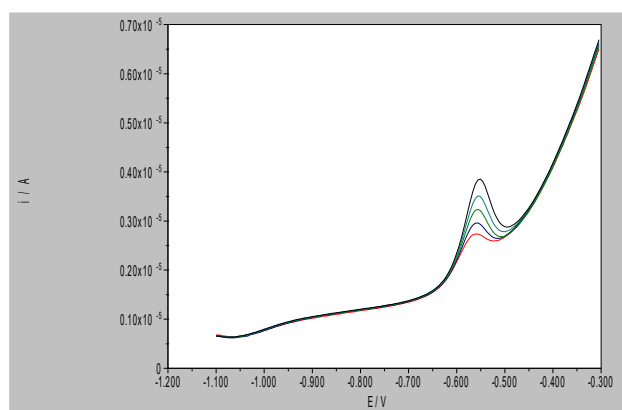

**Figure S3.** Potential (V) versus current (A) graph for standard addition of  $\text{Pb}^{2+}$  solution for oxidized graphite powder.

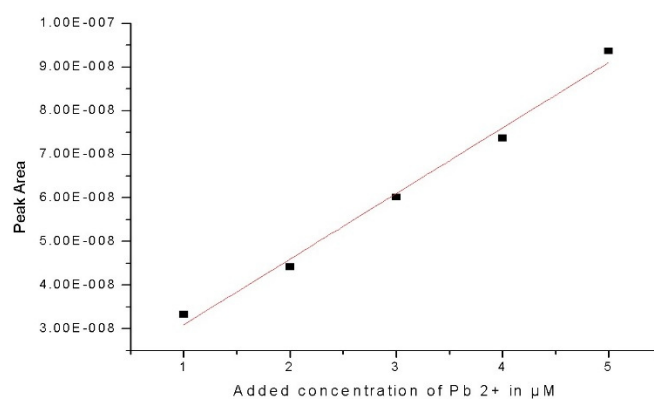

**Figure S4.** Standard addition plot of peak area from Figure S3 against added  $\text{Pb}^{2+}$  concentration (1–5  $\mu\text{M}$ ).

A 10.0 ml of 100  $\mu\text{M}$  of  $\text{Pb}^{2+}$  solution was exposed to 100 mg of oxidized graphite carbon powder. Adsorption capacity of oxidized graphite powder for  $\text{Pb}^{2+}$  was found to be 73.3%. Oxidized graphite powder has greater adsorption capacity of  $\text{Pb}^{2+}$  than graphite because of the presence of COOH or OH groups upon oxidation.
